# Supplementary material for: Unleashing Natural IL18 Activity Using an Anti-IL18BP Blocker Induces Potent Immune Stimulation and Antitumor Effects
Source: PubMed Central journal article supplement — Cancer Immunol Res. 2024 Apr 9;12(6):687–703. doi: 10.1158/2326-6066.CIR-23-0706 (PMC11148541; doi:10.1158/2326-6066.cir-23-0706), 2024-04-09
Supplement: cir-23-0706_supplemental_figure_2_suppsf2.pdf [file cir-23-0706_supplemental_figure_2_suppsf2.pdf]

Supplemental Figure 2

**A**

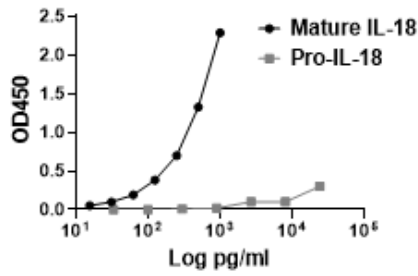

**B**

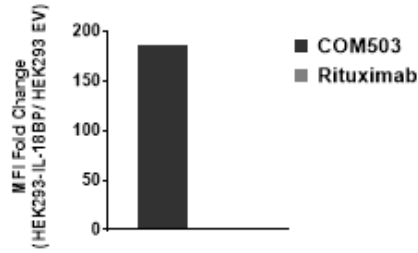

**C**

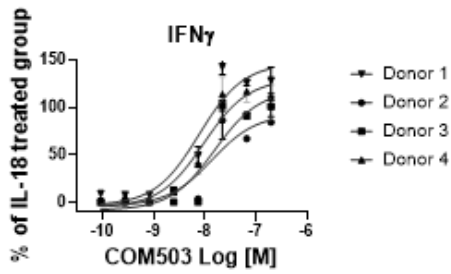

**D**

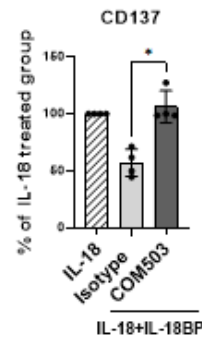

**E**

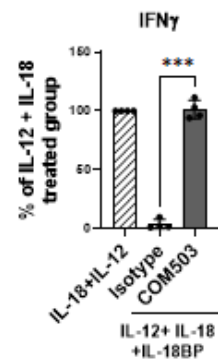

**F**

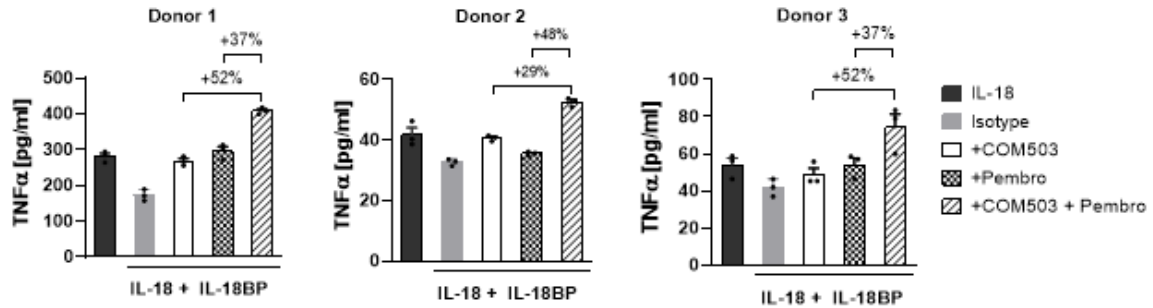

**G**

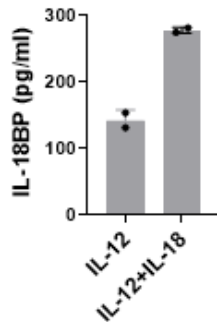

**H**

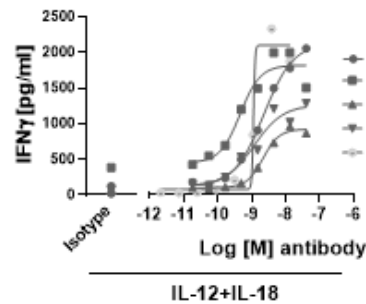

**I**

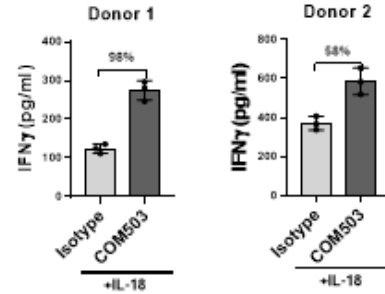

**Supplemental Figure S2. COM503 releases IL-18 activity in biochemical and functional assays.** (A) Detection of mature and pro-IL-18 by human IL-18 ELISA assay. (B) Binding of COM503 (20ug/ml) or Rituximab (1ug/ml) to HEK293 cells overexpressing human IL-18BP measured by flow cytometry. (C-D) *Ex-vivo* stimulated human melanoma CD8<sup>+</sup> TILs (2 independent experiments, 4 donors) were co-cultured with melanoma antigen-expressing MEL624 cells and incubated with rIL-18BP (1ug/ml) and rIL-18 (30ng/ml) to allow the formation of an IL-18:IL-18BP complex before addition of 0.01-30ug/ml COM503 (C) or 10ug/ml COM503 (D) for 24 hours. IFN $\gamma$  secretion was analyzed in cell supernatant (C) and CD137 expression was analyzed on cell membrane (D). Levels of IFN $\gamma$  and CD137 in treatment groups were normalized to those detected in the IL-18 treated group. (E) Human NK cells (3 independent experiments, 4 donors) were stimulated with rIL-12 (10ng/ml) and incubated with rIL-18 (10ng/ml) and rIL-18BP (1ug/ml) to allow the formation of an IL-18:IL-18BP complex before addition of COM503 (10ug/ml) for 24 hours, after which supernatants were collected and analyzed for IFN $\gamma$  secretion. Levels of IFN $\gamma$  in treatment groups were normalized to those detected in the IL-18+IL-12 treated group. (F) CD8<sup>+</sup> CMV-specific T cells (4 independent experiments, 3 donors) were co-cultured with PD-L1-overexpressing MEL624 cells that were pre-pulsed with CMV pp65 peptide and incubated with rIL-18BP (1ug/ml) and rIL-18 (30ng/ml) to allow the formation of an IL-18:IL-18BP complex before addition of COM503 (10ug/ml), Pembrolizumab (aPD-1 Ab, 10ug/ml), or both agents for 24 hours. Supernatants were collected and analyzed for TNF $\alpha$  secretion. (G) Endogenous IL-18BP secreted from human PBMCs stimulated either with IL-12 (10ng/ml) or IL-12 (10ng/ml) plus IL-18 (300ng/ml) for 24 hours measured by ELISA assay. (H) Human PBMCs (6 independent experiments, 5 donors) were stimulated with rIL-18 (2ng/ml) and rIL-12 (10ng/ml) and incubated with COM503 (0.002-6ug/ml) for 24 hours, after which supernatants were collected and analyzed for IFN $\gamma$  secretion. (I) *Ex-vivo* stimulated human melanoma CD8<sup>+</sup> TILs (2 independent experiments, 2 donors) were co-cultured with melanoma antigen-expressing MEL624 cells in the presence of rIL-18 (donor 1- 1.2ng/ml, donor 2- 3.7ng/ml) and incubated with COM503 (30ug/ml) for 24 hours, after which supernatants were collected and analyzed for IFN $\gamma$  secretion. Bar graphs show the mean  $\pm$  SEM; P<0.05\*, P<0.001\*\*\* by One-way ANOVA followed by two-tailed t test. MFI- median florescence intensity.
