# Supplementary material for: Unleashing Natural IL18 Activity Using an Anti-IL18BP Blocker Induces Potent Immune Stimulation and Antitumor Effects
Source: PubMed Central journal article supplement — Cancer Immunol Res. 2024 Apr 9;12(6):687–703. doi: 10.1158/2326-6066.CIR-23-0706 (PMC11148541; doi:10.1158/2326-6066.cir-23-0706), 2024-04-09
Supplement: cir-23-0706_supplemental_figure_3_suppsf3.pdf [file cir-23-0706_supplemental_figure_3_suppsf3.pdf]

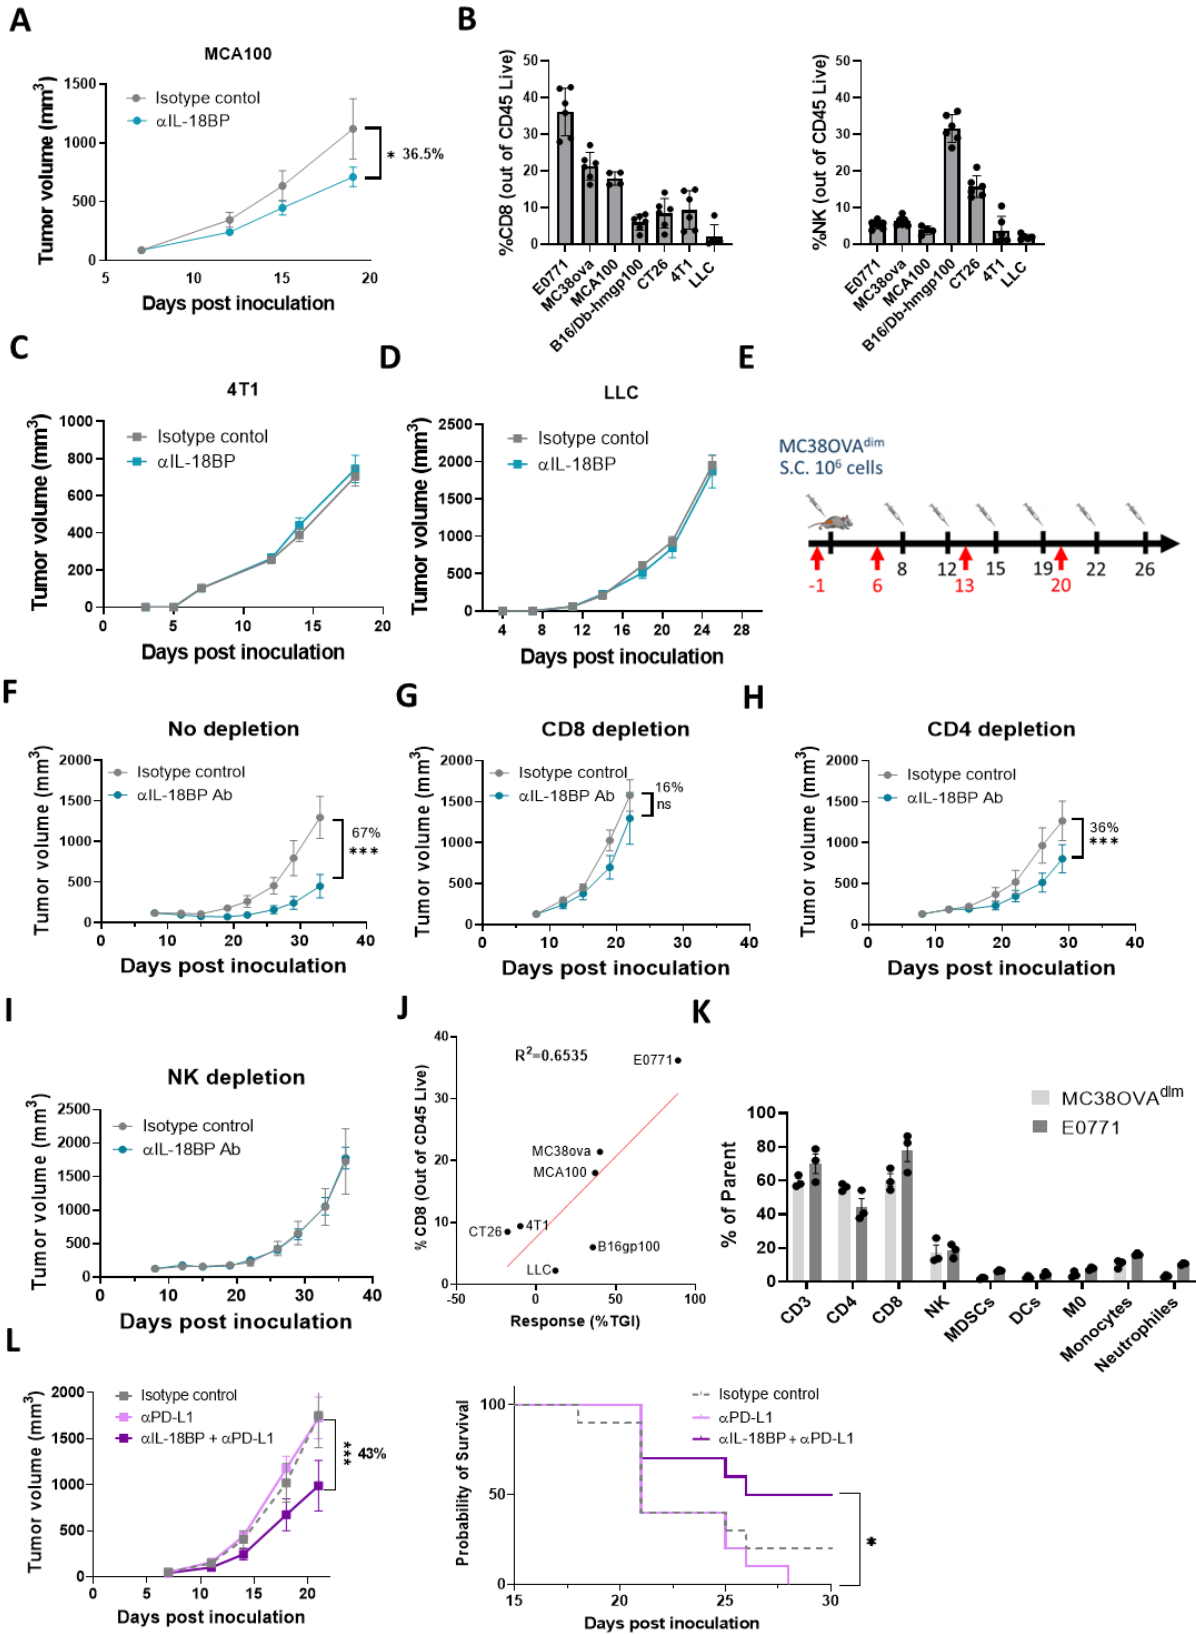

**Supplemental Figure S3. Antitumor activity of anti-mouse-IL-18BP Ab in mice studies.** (A) MCA100 mouse tumor cells were inoculated in C57Bl/6 mice as described in material and methods. At a tumor volume of 190 mm<sup>3</sup> mice were randomized (n=10 per group) and treated either with anti-IL-18BP Ab or with isotype control (15mg/kg) twice a week for total of 6 treatments. Experiment was performed once. (B) E0771, MC38OVA<sup>dim</sup>, MCA100, B16/Db-hmgrp100, CT26, 4T1, and LLC tumors were dissociated by gentleMACS using mouse dissociation kit. Dissociated tumor cells were blocked with a cocktail of anti-CD16, anti-CD32 and anti-CD64 Abs to block nonspecific binding to Fcγ receptors and stained with a target Ab or isotype control cocktail to measure the percentage of CD8<sup>+</sup> T and NK cells in each sample. Samples were acquired on a Fortessa X-20 flow cytometer. Bar graphs show the mean ± SD. Each dot represents one mouse. (C-D) 4T1 (representative experiment out of 2) (C), and LLC (experiment was performed once) (D) mouse tumor cells were inoculated in BALB/c or C57Bl/6 mice as described in material and methods. or on day 4 post inoculation, mice were randomized (n=10 per group) and treated either with anti-IL-18BP Ab or with isotype control (15mg/kg) twice a week for total of 6 treatments. Tumor volumes are represented as the Mean volume ± SEM. Kaplan-Meier. (E-I) The activity of IL-18BP blockade depends on CD8<sup>+</sup> T cells and on NK cells in MC38OVA<sup>dim</sup> tumor model. Representative experiment out of 2 is shown. (E) MC38OVA<sup>dim</sup> engrafted mice were assigned into 4 groups (n=8-10) and were injected with anti-CD4 (GK1.5, 300ug), anti-CD8 (Lyt 3.2, 100ug), anti-NK1.1 (PK136, 50ug) or isotype control (100ug) prior to tumor inoculation (day -1), and on days 6, 13 and 20 (red arrows). At tumor volume of 120 mm<sup>3</sup> mice were randomized and treated either with anti-IL-18BP Ab or with isotype control (10mg/kg) twice a week for a total of 6 treatments. Tumor volumes are represented as the Mean volume + SEM. Tumor growth was examined in non-depleted control mice (F), CD8<sup>+</sup> cells depleted mice (G), CD4<sup>+</sup> cells depleted mice (H), and NK cells depleted mice (I). (J) The percent of CD8<sup>+</sup> T cells infiltrating the tumor models E0771, MC38OVA<sup>dim</sup>, MCA100, B16/Db-hmgrp100, CT26, 4T1, and LLC was correlated to the tumor growth inhibition (TGI) induced by IL-18BP blockade in each model. (K) Immune cell populations were isolated from mouse tumors and stained for IL-18Rα expression by flow cytometry. Bar graphs show the mean ± SEM. Each dot represents one mouse. (L) Anti-mouse IL-18BP Ab (15mg/kg) synergized with anti PD-L1 Ab (5mg/kg) to inhibit tumor growth in CT26 tumor model. CT26 tumor cells were inoculated in BALB/c mice as described in material and methods. On day 4 post inoculation, mice were randomized (n=10 per group) and treated either

with anti-IL-18BP Ab, isotype control (15mg/kg), anti-PD-L1 Ab (5mg/kg) or with both agents twice a week for a total of 6 treatments. Representative experiment out of 4 is shown. Tumor volumes are represented as the Mean volume  $\pm$  SEM. Kaplan-Meier survival curves for each group are shown.  $P < 0.05^*$ ,  $P < 0.001^{***}$  by two-way ANOVA with repeated measures and Log Rank Mantel-Cox test for survival analysis
