# Supplementary material for: Unleashing Natural IL18 Activity Using an Anti-IL18BP Blocker Induces Potent Immune Stimulation and Antitumor Effects
Source: PubMed Central journal article supplement — Cancer Immunol Res. 2024 Apr 9;12(6):687–703. doi: 10.1158/2326-6066.CIR-23-0706 (PMC11148541; doi:10.1158/2326-6066.cir-23-0706), 2024-04-09
Supplement: cir-23-0706_supplemental_figure_4_suppsf4.pdf [file cir-23-0706_supplemental_figure_4_suppsf4.pdf]

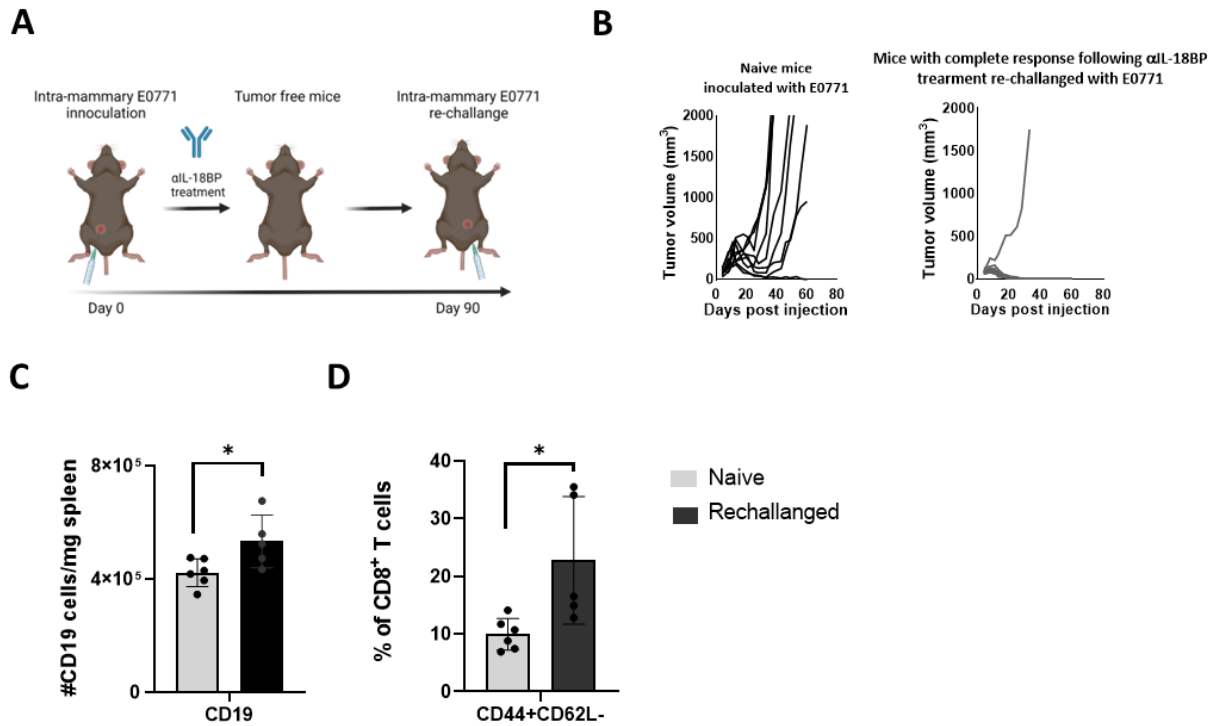

**Supplemental Figure S4. Anti-IL-18BP Ab induced immunogenic memory response in E0771 tumor model.** (A) E0771 tumor cells were inoculated in C57Bl/6 mice. At tumor volume of 250mm<sup>3</sup>, mice were randomized (n=10 per group) and either treated with anti-IL-18BP Ab or isotype control (15mg/kg) twice a week for total of 6 treatments. Two months after primary tumor inoculation, mice with no evident residual tumors and tumor-naïve aged-matched mice were re-inoculated with E0771 tumor cells. Representative experiment out of 2 is shown. (B) Individual tumors measurements for each mouse are depicted. (C) Number of CD19<sup>+</sup> cells per mg spleen. (D) percent of CD44<sup>+</sup>CD62L<sup>-</sup>CD8<sup>+</sup> effector T cells. Bar graphs show the mean ± SEM; P<0.05\* by two-tailed t test.
