# Supplementary material for: Unleashing Natural IL18 Activity Using an Anti-IL18BP Blocker Induces Potent Immune Stimulation and Antitumor Effects
Source: PubMed Central journal article supplement — Cancer Immunol Res. 2024 Apr 9;12(6):687–703. doi: 10.1158/2326-6066.CIR-23-0706 (PMC11148541; doi:10.1158/2326-6066.cir-23-0706), 2024-04-09
Supplement: cir-23-0706_supplemental_figure_5_suppsf5.pdf [file cir-23-0706_supplemental_figure_5_suppsf5.pdf]

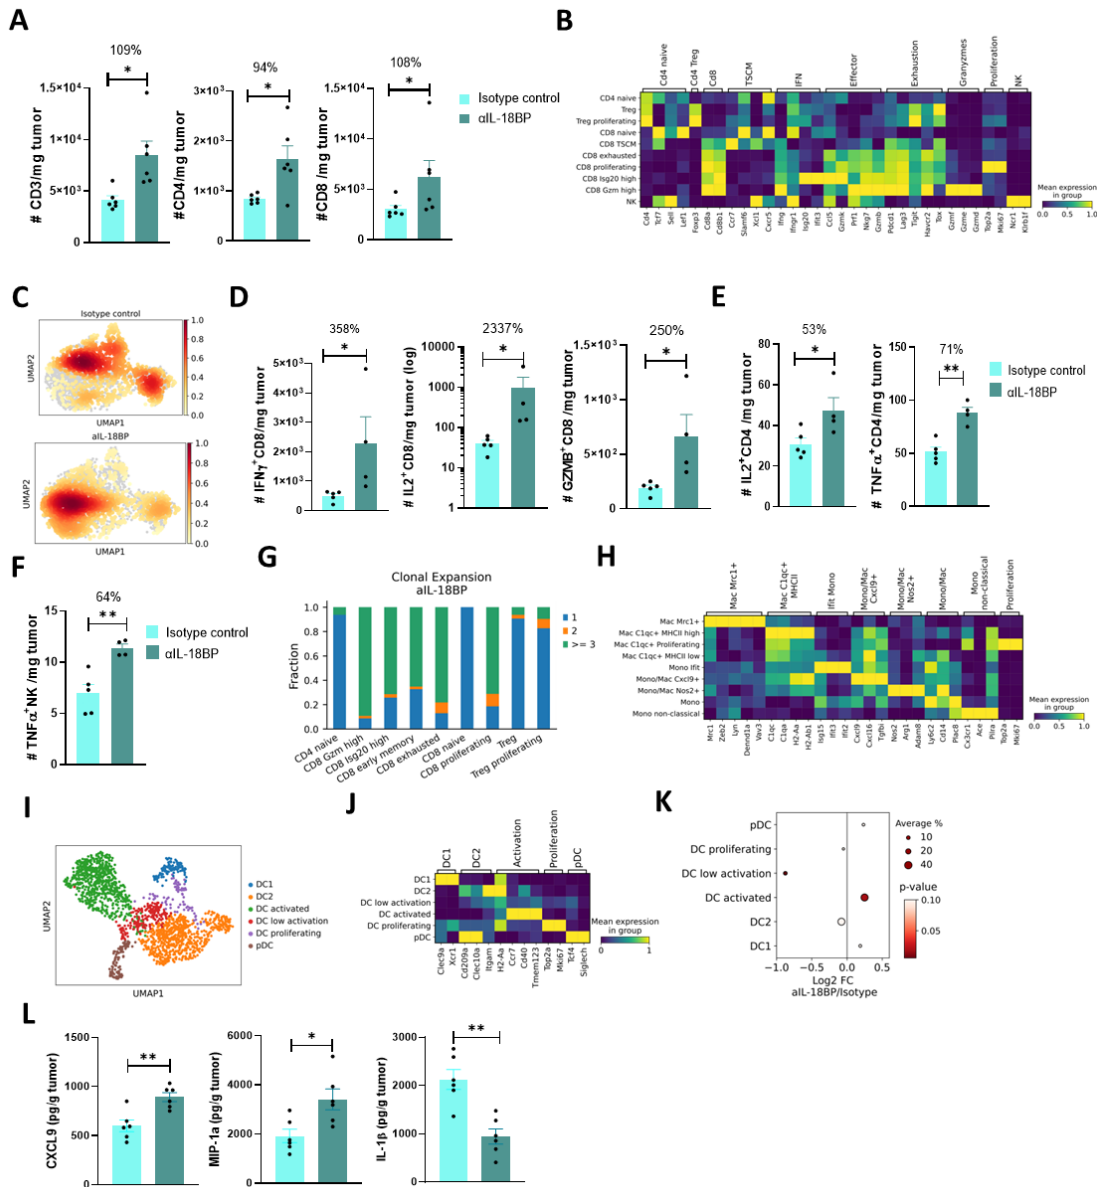

**Supplemental Figure S5. IL-18BP blockade alters the immune infiltrate composition of E0771 tumors.** E0771 tumor cells were inoculated in C57Bl/6 mice and treated either with anti-IL-18BP Ab or isotype control (n=6 per group, 15mg/kg) twice a week for a total of 3 treatments. TME modulation was assessed by flow cytometry, scRNA-seq and cytokines profiling. Cytokine intracellular staining was done following *ex vivo* stimulation with phorbol myristate acetate and ionomycin. **(A)** Number of CD3<sup>+</sup>, CD8<sup>+</sup> and CD4<sup>+</sup> T cells per mg tumor were analyzed using flow cytometry. **(B)** Heatmap showing markers for different T/NK subpopulations. **(C)** Visualization of the average cell density within the anti-IL-18BP (bottom) and Isotype control (top) group, using

embedding density estimation on T/NK UMAP. Darker colors correspond to denser regions. **(D-F)** Numbers of functional CD8<sup>+</sup> **(D)** and CD4<sup>+</sup> **(E)** T cells and activated NK cells **(F)** were analyzed using flow cytometry. **(G)** Stacked bar plot for IL-18BP Ab treatment group showing the fraction of T cells that belong to an expanded clonotype separated for T cell subtypes. **(H)** Heatmap showing markers for different monocyte and macrophage subpopulations. **(I)** UMAP projection of DC subpopulations in E0771 tumors. **(J)** Heatmap showing markers for different DC subpopulations. **(K)** Enrichment of DC subpopulations frequencies in anti-IL-18BP Ab treatment compared to the control group. Depicted is the log<sub>2</sub> fold change of the mean frequency. The size of the dots indicates the average fraction of the cell population between treatments, while the color of the dots represents the P values of two-tailed t test. **(L)** CXCL9, MIP-1a and IL-1b levels in tumor derived supernatant were analyzed using CBA inflammation kit. Bar graphs show the mean  $\pm$  SEM; P<0.05\*, P<0.01\*\* by two-tailed t test or Mann-Whitney test.
